# Supplementary material
Source: PubMed Central journal article supplement (PMC4826609)

**Online Supplement**

**Index**

Supplementary Text – Page 2

Supplementary Tables – Page 3

Supplementary Figures – Page 8

**Supplementary Text.** Network meta-analysis.

Network meta-analysis is a technique used in meta-analysis of randomised controlled trials to leverage indirect evidence. With this method, evidence from comparisons between exposures A vs B and B vs C may be used to estimate the comparison A vs C. In this manuscript, we used network meta-analysis to estimate relative risks comparing metabolically healthy vs unhealthy individuals within BMI categories, as shown in the Figure.

*Inset Figure.* Network meta-analysis approach to estimate within-stratum relative risk. MHL, metabolically healthy lean; MUL, metabolically unhealthy lean; MHOW, metabolically healthy overweight; MUOW, metabolically unhealthy overweight; MHO, metabolically healthy obese; MUO, metabolically unhealthy obese.

## Problem of estimating within stratum RR

|                         | Lean     | Overweight | Obese    |
|-------------------------|----------|------------|----------|
| Metabolically healthy   | (a1) MHL | (b1) MHOW  | (c1) MHO |
| Metabolically unhealthy | (a2) MUL | (b2) MUOW  | (c2) MUO |

Available:  
a2 – a1  
b1 – a1  
b2 – a1  
c1 – a1  
c2 – a1

Unavailable:  
b2 – b1  
c2 – c1

## Network meta-analysis

| Study      | Analysis | Reference | Comparison | OR  | 95% CI    |
|------------|----------|-----------|------------|-----|-----------|
| Meigs 2006 | 1        | MHL       | MHOW       | 1.3 | 0.9 – 1.9 |
| Meigs 2006 | 2        | MHL       | MUOW       | 2.1 | 1.4 – 3.2 |
| Meigs 2006 | NMA      | MHOW      | MUOW       | 1.6 | 0.9 – 2.8 |

Results obtained from network meta-analysis had very similar central estimates to the ones obtained from publications (n = 1, i.e. Hinnouho et al.) or from the authors (n = 8; see also Supplementary Table S1). The widths of confidence intervals were larger for network meta-analysis based estimates compared with those obtained by direct analysis.

**Supplementary Table S1.** Comparison of estimates obtained from authors versus those obtained by network meta-analysis.

| PMID     | Study              | T2D risk in overweight obtained from authors, RR (95% CI) | T2D risk in overweight obtained by NMA, RR (95% CI) | T2D risk in obese obtained from authors, RR (95% CI) | T2D risk in obese obtained by NMA, RR (95% CI) |
|----------|--------------------|-----------------------------------------------------------|-----------------------------------------------------|------------------------------------------------------|------------------------------------------------|
| 23034958 | Bo 2012            | 3.5<br>(1.4 – 8.7) *                                      | 3.5<br>(0.4 – 31.4)                                 | 2.0<br>(0.7 – 5.9) *                                 | 2.0<br>(0.2 – 18.9)                            |
| 24361070 | Sung 2012          | 1.9<br>(1.3 – 2.9) *                                      | 1.9<br>(0.8 – 4.5)                                  | 2.9<br>(1.4 – 5.9) *                                 | 2.8<br>(0.9 – 8.3)                             |
| 23559087 | Soriguer 2013      | 6.1<br>(1.4 – 27.4) *                                     | 5.6<br>(0.6 – 51.8)                                 | 3.0<br>(1.1 – 8.4) *                                 | 2.5<br>(0.3 – 18.3)                            |
| 24670711 | Hinnouho 2014      | 2.6<br>(2.1 – 3.2) *                                      | 2.5<br>(1.8 – 3.4)                                  | 2.0<br>(1.4 – 2.8) *                                 | 2.1<br>(1.4 – 3.3)                             |
| 25139886 | Twig 2014          | 2.2<br>(1.7 – 2.7) *                                      | 2.2<br>(1.5 – 3.0)                                  | 2.1<br>(1.6 – 2.7) *                                 | 2.1<br>(1.4 – 3.0)                             |
| 25155902 | Jung 2014          | 5.5<br>(4.0 – 7.5) *                                      | 5.5<br>(3.2 – 9.4)                                  | 2.9<br>(1.8 – 4.9) *                                 | 2.9<br>(1.5 – 5.7)                             |
| 25131796 | Heianza 2014       | 4.0<br>(3.5 – 4.6) *                                      | 3.9<br>(3.0 – 5.0)                                  | 3.1<br>(2.3 – 4.0) *                                 | 3.0<br>(2.1 – 4.2)                             |
| 24823457 | Heianza 2014       | 4.3<br>(2.8 – 6.5) *                                      | 4.3<br>(2.3 – 8.0)                                  | 2.2<br>(1.0 – 4.8) *                                 | 2.1<br>(0.9 – 5.2)                             |
| 24870949 | Rhee 2013          | 5.2<br>(3.3 – 8.4) *                                      | 5.2<br>(2.2 – 12.7)                                 | 3.4<br>(1.5 – 8.1) *                                 | 3.4<br>(1.1 – 10.8)                            |
| 16735483 | Meigs 2006         | Not available                                             | 6.1<br>(2.1 – 17.4) *                               | Not available                                        | 4.7<br>(1.5 – 14.7) *                          |
| 20852030 | Arnlov 2011        | Not available                                             | 2.2<br>(1.1 – 4.5) *                                | Not available                                        | 0.9<br>(0.3 – 2.6) *                           |
| 23491523 | Appleton 2013      | Not available                                             | 5.1<br>(1.5 – 17.0) *                               | Not available                                        | 3.7<br>(1.2 – 11.6) *                          |
| 22621338 | Kim 2012           | Not available                                             | 3.8<br>(2.1 – 7.0) *                                | Not available                                        | 3.9<br>(1.8 – 8.4) *                           |
| 21609497 | Hadaegh 2011 men   | Not available                                             | 2.1<br>(1.0 – 4.7) *                                | Not available                                        | 1.6<br>(0.6 – 4.5) *                           |
| 21609497 | Hadaegh 2011 women | Not available                                             | 3.3<br>(1.3 – 8.4) *                                | Not available                                        | 5.7<br>(2.1 – 15.5) *                          |
| 24661566 | Bell 2014          | Not available                                             | 5.8<br>(1.0 – 32.7) *                               | Not available                                        | 2.7<br>(0.5 – 15.4) *                          |
| 24257907 | Aung 2014          | Not available                                             | 3.2<br>(1.4 – 7.4) *                                | Not available                                        | 2.8<br>(1.2 – 6.7) *                           |

PMID, Pubmed identity; T2D, type 2 diabetes; RR, relative risk; CI, confidence interval; NMA, network meta-analysis.  
\*used for the main analysis

**Supplementary Table S2.** Main analysis results when the studies of Sung et al. or Rhee et al. were included in the meta-analysis instead of those of Jung et al.

| Analysis             | Reference Group                  | Individuals at risk / incident T2D, N / N | Comparison Group                   | Individuals at risk / incident T2D, N / N | RR <sub>T2D</sub> (95% CI) | P-value | I-squared % |
|----------------------|----------------------------------|-------------------------------------------|------------------------------------|-------------------------------------------|----------------------------|---------|-------------|
| Sung et al. included | Metabolically Healthy Lean       | 46,320 / 753                              | Metabolically Unhealthy Lean       | 7,479 / 533                               | 3.9 (2.9 – 5.2)            | < 0.001 | 69.4        |
| Sung et al. included | Metabolically Healthy Overweight | 29,866 / 925                              | Metabolically Unhealthy Overweight | 16,060 / 1,650                            | 3.1 (2.5 – 3.8)            | < 0.001 | 63.4        |
| Sung et al. included | Metabolically Healthy Obese      | 5,395 / 323                               | Metabolically Unhealthy Obese      | 7,479 / 1,167                             | 2.5 (2.1 – 3.0)            | < 0.001 | 11.6        |
| Rhee et al. included | Metabolically Healthy Lean       | 48,668 / 752                              | Metabolically Unhealthy Lean       | 7,521 / 520                               | 4.1 (3.1 – 5.4)            | < 0.001 | 69.5        |
| Rhee et al. included | Metabolically Healthy Overweight | 32,937 / 950                              | Metabolically Unhealthy Overweight | 16,058 / 1,586                            | 3.4 (2.7 – 4.1)            | < 0.001 | 61.0        |
| Rhee et al. included | Metabolically Healthy Obese      | 5,799 / 327                               | Metabolically Unhealthy Obese      | 7,721 / 1,162                             | 2.5 (2.1 – 3.0)            | < 0.001 | 13.9        |

T2D, type 2 diabetes; RR, relative risk; CI, confidence interval.

**Supplementary Table S3.** Definitions of metabolic health. The Table reports definitions used in the studies selected for full article review. In parentheses the number of studies using a given definition is reported.

---

*Definition Category (n = 177)*

---

- Metabolic syndrome (*n = 72*)
  - Adult Treatment Panel III criteria
  - Customised or modified criteria
  - International Diabetes Federation
  - Harmonised criteria
  
- Combination of metabolic syndrome with insulin resistance or other (*n = 54*)
  - Metabolic syndrome and insulin resistance
  - Metabolic syndrome, insulin resistance and C-reactive protein
  - Metabolic syndrome and C-reactive protein
  - Metabolic syndrome and medical history
  - Other
  
- Insulin resistance (*n = 37*)
  - Homeostatic model assessment – insulin resistance
  - Hyperinsulinaemic euglycaemic clamp
  - Other
  
- Cardiorespiratory fitness (*n = 4*)
  
- Miscellaneous (*n = 10*)

---

**Supplementary Table S4.** Relative risk of type 2 diabetes in different metabolic health and BMI categories compared with the metabolically healthy lean category.

| Study                                                   | Metabolically Healthy Lean, RR (95% CI) | Metabolically Unhealthy Lean, RR (95% CI) | Metabolically Healthy Overweight, RR (95% CI) | Metabolically Unhealthy Overweight, RR (95% CI) | Metabolically Healthy Obese, RR (95% CI) | Metabolically Unhealthy Obese, RR (95% CI) |
|---------------------------------------------------------|-----------------------------------------|-------------------------------------------|-----------------------------------------------|-------------------------------------------------|------------------------------------------|--------------------------------------------|
| 2006 Meigs<br>J Clin Endocrinol<br>Metab                | Referent                                | 4.0<br>(1.4–11.6)                         | 1.1<br>(0.5–2.4)                              | 6.8<br>(3.4–13.4)                               | 2.2<br>(0.9–5.6)                         | 10.3<br>(5.4–19.5)                         |
| 2011 Amlöv<br>Diabetes Care                             | Referent                                | 3.3<br>(1.4–7.8)                          | 3.5<br>(2.3–5.4)                              | 7.8<br>(4.4–13.6)                               | 11.7<br>(4.9–28.2)                       | 10.1<br>(5.2–19.5)                         |
| 2013 Appleton<br>Diabetes Care                          | Referent                                | 2.3<br>(0.7–7.5)                          | 0.9<br>(0.4–2.2)                              | 4.5<br>(2.1–9.7)                                | 2.1<br>(0.9–5.0)                         | 7.8<br>(3.8–16.0)                          |
| 2012 Kim<br>Metab Syndr Relat<br>Disord                 | Referent                                | 7.3<br>(3.4–15.9)                         | 2.6<br>(1.7–4.0)                              | 10.1<br>(6.5–15.7)                              | 4.3<br>(2.4–7.9)                         | 16.7<br>(10.4–26.8)                        |
| 2011 Hadaegh<br>BMC Public Health –<br>Men              | Referent                                | 3.1<br>(1.3–7.0)                          | 1.6<br>(0.9–2.9)                              | 3.4<br>(2.0–5.8)                                | 3.6<br>(1.5–8.4)                         | 5.7<br>(3.3–9.9)                           |
| 2011 Hadaegh<br>BMC Public Health –<br>Women            | Referent                                | 8.8<br>(3.7–21.2)                         | 2.3<br>(1.2–4.3)                              | 7.7<br>(4.0–14.9)                               | 2.2<br>(1.0–4.7)                         | 12.6<br>(6.9–23.2)                         |
| 2012 Bo<br>Am J Clin Nutr                               | Referent                                | 16.7<br>(3.5–79.7)                        | 5.7<br>(1.1–28.5)                             | 20.0<br>(4.7–85.0)                              | 15.8<br>(2.8–88.3)                       | 31.4<br>(7.4–133.6)                        |
| 2013 Soriguer<br>J Clin Endocrinol<br>Metab             | Referent                                | 5.2<br>(0.8–34.9)                         | 0.7<br>(0.1–3.6)                              | 3.9<br>(0.9–17.0)                               | 3.0<br>(0.7–12.4)                        | 7.3<br>(1.8–29.2)                          |
| 2014 Bell<br>Obes Rev                                   | Referent                                | 9.9<br>(2.9–36.7)                         | 2.9<br>(0.8–10.3)                             | 16.7<br>(5.2–54.2)                              | 8.6<br>(2.4–30.4)                        | 23.5<br>(7.3–75.6)                         |
| 2014 Hinnouho<br>Eur Heart J                            | Referent                                | 3.2<br>(2.5–4.1)                          | 1.6<br>(1.2–2.0)                              | 3.9<br>(3.2–4.8)                                | 3.2<br>(2.3–4.5)                         | 6.9<br>(5.4–8.8)                           |
| 2014 Aung<br>J Clin Endocrinol<br>Metab                 | Referent                                | 2.5<br>(1.1–5.6)                          | 1.8<br>(1.0–3.4)                              | 5.8<br>(3.2–10.4)                               | 3.9<br>(2.0–7.4)                         | 10.9<br>(6.2–19.2)                         |
| 2014 Twig Diabetes<br>Care                              | Referent                                | 1.7<br>(1.2–2.4)                          | 1.5<br>(1.2–2.0)                              | 3.3<br>(2.6–4.2)                                | 3.2<br>(2.4–4.4)                         | 6.7<br>(5.3–8.5)                           |
| 2014 Jung<br>Obesity                                    | Referent                                | 3.8<br>(2.7–5.4)                          | 1.6<br>(1.0–2.4)                              | 8.6<br>(6.3–11.8)                               | 6.4<br>(3.6–11.3)                        | 18.7<br>(13.4–26.0)                        |
| 2014 Heianza Obesity                                    | Referent                                | 4.7<br>(3.9–5.7)                          | 2.0<br>(1.7–2.4)                              | 7.9<br>(6.8–9.2)                                | 4.7<br>(3.6–6.1)                         | 13.9<br>(11.6–16.7)                        |
| 2014 Heianza<br>J Clin Endocrinol<br>Metab              | Referent                                | 4.9<br>(3.2–7.4)                          | 1.3<br>(0.8–2.2)                              | 5.6<br>(3.8–8.3)                                | 5.9<br>(2.8–12.5)                        | 12.6<br>(7.9–20.3)                         |
| <b>Meta-analysis<br/>-<br/>Random Effects<br/>Model</b> | <b>Referent</b>                         | <b>4.0<br/>(3.0–5.1)</b>                  | <b>1.8<br/>(1.5–2.2)</b>                      | <b>6.2<br/>(4.8–8.0)</b>                        | <b>4.1<br/>(3.3–5.1)</b>                 | <b>10.9<br/>(8.5–13.9)</b>                 |

**Supplementary Table S5.** Cumulative incidence of type 2 diabetes in metabolic health and body mass index categories after the exclusion of studies in East Asian populations.

| BMI category | BMI category cumulative incidence at 5 years <sup>a</sup> | BMI category cumulative incidence at 10 years <sup>a</sup> | Risk category                      | Proportion of healthy or unhealthy individuals in each BMI category | Relative risk within BMI category | Risk category 5 year cumulative incidence (95% CI*) | Risk category 10 year cumulative incidence (95% CI*) |
|--------------|-----------------------------------------------------------|------------------------------------------------------------|------------------------------------|---------------------------------------------------------------------|-----------------------------------|-----------------------------------------------------|------------------------------------------------------|
| Lean         | 0.3 %                                                     | 0.8 %                                                      | Metabolically Healthy Lean         | 0.87                                                                | 1                                 | 0.2%<br>(0.2 – 0.2%)                                | 0.6%<br>(0.5 – 0.7%)                                 |
|              |                                                           |                                                            | Metabolically Unhealthy Lean       | 0.13                                                                | 3.6                               | 0.7%<br>(0.5 – 0.9%)                                | 2.2%<br>(1.7 – 2.8%)                                 |
| Over weight  | 0.8 %                                                     | 2.7 %                                                      | Metabolically Healthy Overweight   | 0.66                                                                | 1                                 | 0.5%<br>(0.5 – 0.6%)                                | 1.7%<br>(1.6 – 1.9%)                                 |
|              |                                                           |                                                            | Metabolically Unhealthy Overweight | 0.34                                                                | 2.5                               | 1.3%<br>(1.2 – 1.4%)                                | 4.4%<br>(4.1 – 4.7%)                                 |
| Obese        | 1.8 %                                                     | 5.9 %                                                      | Metabolically Healthy Obese        | 0.42                                                                | 1                                 | 1.1%<br>(0.9 – 1.3%)                                | 3.5%<br>(2.9 – 4.1%)                                 |
|              |                                                           |                                                            | Metabolically Unhealthy Obese      | 0.58                                                                | 2.2                               | 2.4%<br>(2.2 – 2.6%)                                | 7.7%<br>(7.2 – 8.1%)                                 |

**Supplementary Figure S1.** Relative risk of type 2 diabetes in different metabolic health and BMI categories compared with the metabolically healthy lean category in adjusted analyses.

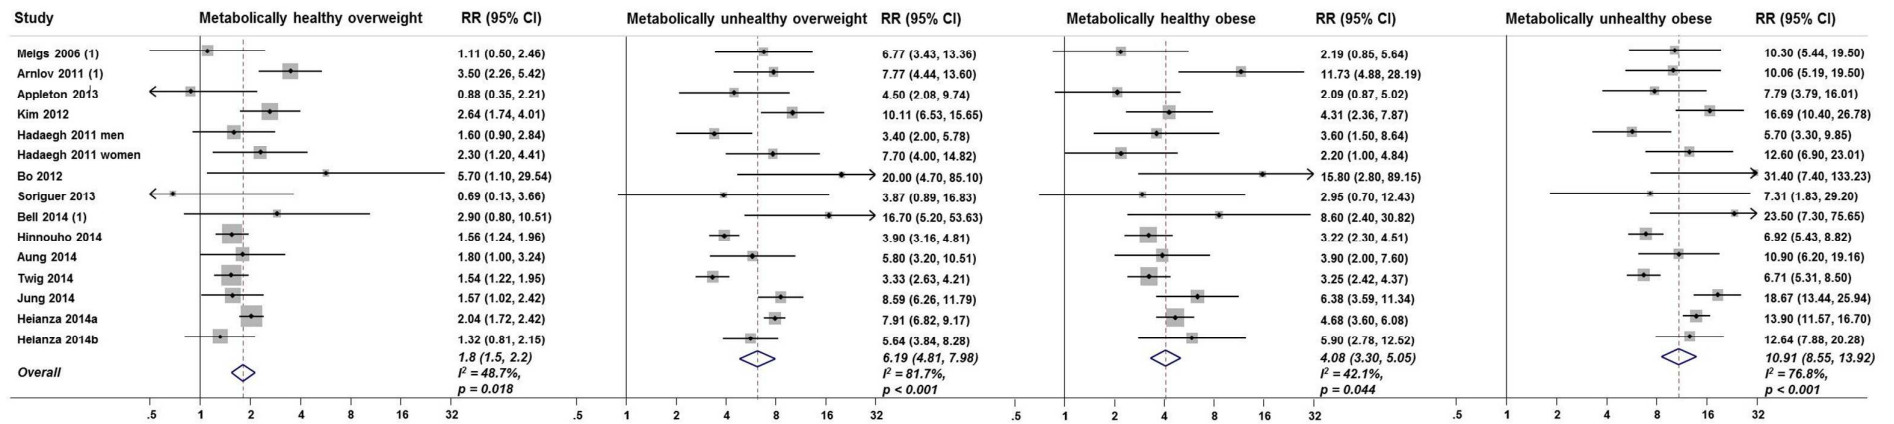



Supplementary Figure S2. Representative funnel plot indicating no publication bias for the meta-analysis of type 2 diabetes risk within obese. P-value from Egger's test = 0.53.

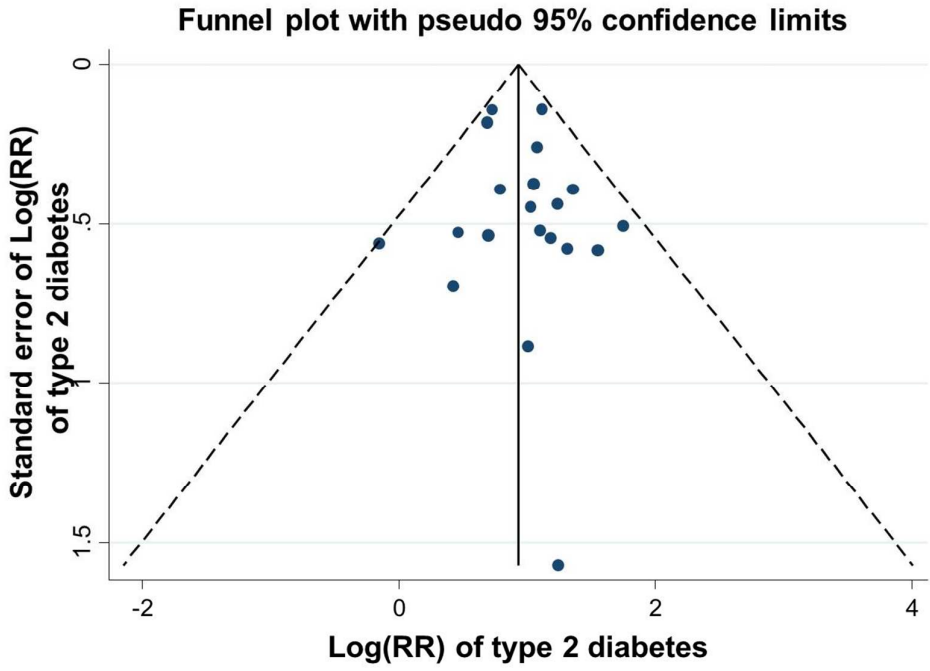

**Supplementary Figure S3.** Relative risk of type 2 diabetes in metabolically healthy vs unhealthy lean individuals in European and East Asian populations.

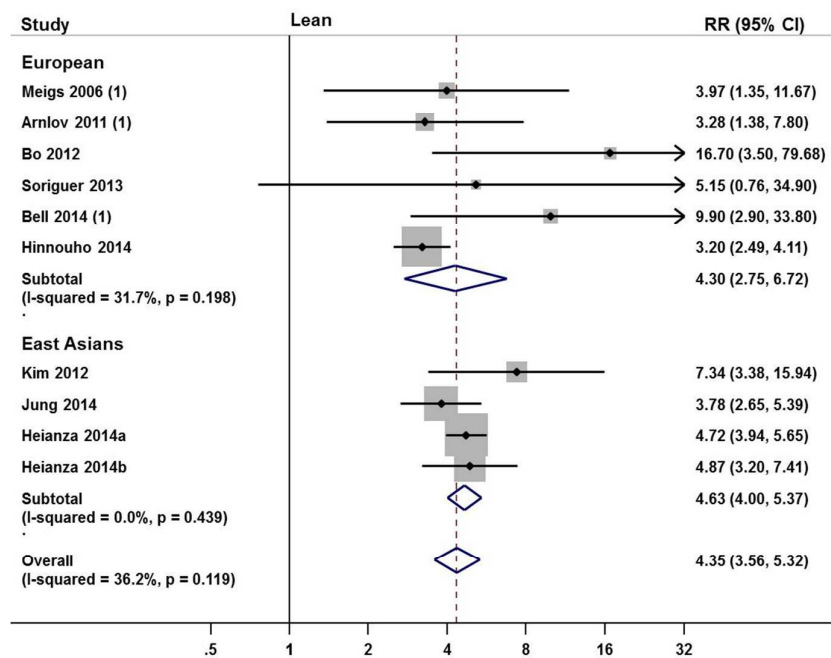

Supplement: NIHMS67071-supplement-01.pdf [file NIHMS67071-supplement-01.pdf]
